# Supplementary material for: Cellular interplay via cytokine hierarchy causes pathological cardiac hypertrophy in RAF1-mutant Noonan syndrome
Source: PubMed Central journal article supplement (PMC5458545; doi:10.1038/ncomms15518), 2017-05-26
Supplement: ncomms15518-s1.pdf [file ncomms15518-s1.pdf]

### Supplementary Table 1. Additional echocardiographic parameters.

| Cre Genotype | Mlc2v    |          |         |          | Fsp1     |          |         |          | Tie2     |          |         |          |
|--------------|----------|----------|---------|----------|----------|----------|---------|----------|----------|----------|---------|----------|
|              | Baseline |          | 2wk TAC |          | Baseline |          | 2wk TAC |          | Baseline |          | 2wk TAC |          |
|              | Control  | L613V    | Control | L613V    | Control  | L613V    | Control | L613V    | Control  | L613V    | Control | L613V    |
| n            | 29       | 11       | 20      | 8        | 18       | 7        | 16      | 9        | 24       | 12       | 36      | 11       |
| HR (bpm)     | 490 ± 10 | 520 ± 20 | 548 ± 7 | 577 ± 8* | 507 ± 12 | 490 ± 22 | 550 ± 6 | 577 ± 23 | 512 ± 12 | 532 ± 11 | 556 ± 6 | 561 ± 10 |
| SV (μL)      | 42 ± 1   | 44 ± 2   | 31 ± 1  | 34 ± 2   | 40 ± 1   | 39 ± 1   | 31 ± 1  | 29 ± 2   | 42 ± 1   | 58 ± 2*  | 30 ± 1  | 37 ± 2*  |
| EF (%)       | 63 ± 1   | 73 ± 2*  | 42 ± 2  | 47 ± 5   | 51 ± 2   | 47 ± 2   | 43 ± 2  | 42 ± 4   | 63 ± 1   | 58 ± 2*  | 41 ± 2  | 40 ± 2   |
| FS (%)       | 34 ± 1   | 42 ± 2*  | 20 ± 1  | 24 ± 4   | 26 ± 1   | 24 ± 1   | 21 ± 1  | 21 ± 2   | 34 ± 1   | 31 ± 1   | 20 ± 1  | 20 ± 1   |
| CO (mL/min)  | 20 ± 1   | 22 ± 1   | 17 ± 1  | 20 ± 1*  | 20 ± 1   | 19 ± 1   | 17 ± 1  | 16 ± 1   | 21 ± 1   | 31 ± 1*  | 17 ± 1  | 21 ± 1*  |

HR, heart rate; SV, stroke volume; EF, ejection fraction; FS, fractional shortening; CO, cardiac output. All measurements are means ± S.E.M. \*  $P < 0.05$  vs. respective controls; two-tailed Student's  $t$  test.

### Supplementary Table 2. Additional hemodynamic parameters.

| Cre Genotype    | Mlc2v       |               |             |             | Fsp1        |             |             |             | Tie2        |             |             |             |
|-----------------|-------------|---------------|-------------|-------------|-------------|-------------|-------------|-------------|-------------|-------------|-------------|-------------|
|                 | Baseline    |               | 2wk TAC     |             | Baseline    |             | 2wk TAC     |             | Baseline    |             | 2wk TAC     |             |
|                 | Control     | L613V         | Control     | L613V       | Control     | L613V       | Control     | L613V       | Control     | L613V       | Control     | L613V       |
| n               | 39          | 16            | 20          | 8           | 18          | 7           | 18          | 11          | 27          | 13          | 36          | 11          |
| HR (bpm)        | 533 ± 6     | 550 ± 13      | 519 ± 10    | 534 ± 11    | 484 ± 10    | 500 ± 15    | 514 ± 8     | 500 ± 23    | 516 ± 9     | 521 ± 14    | 522 ± 8     | 512 ± 17    |
| LVP (mmHg)      | 124 ± 2     | 114 ± 3*      | 173 ± 4     | 174 ± 7     | 112 ± 3     | 110 ± 5     | 180 ± 4     | 178 ± 4     | 123 ± 3     | 107 ± 3*    | 173 ± 3     | 178 ± 4     |
| EDP (mmHg)      | 5 ± 1       | 5 ± 1         | 17 ± 2      | 17 ± 4      | 6 ± 1       | 5 ± 1       | 19 ± 2      | 14 ± 2      | 7 ± 1       | 6 ± 1       | 19 ± 2      | 18 ± 2      |
| SysP (mmHg)     | 120 ± 3     | 110 ± 5*      | 170 ± 3     | 170 ± 8     | 108 ± 3     | 106 ± 5     | 178 ± 4     | 175 ± 4     | 120 ± 3     | 101 ± 3*    | 169 ± 3     | 175 ± 4     |
| DiaP (mmHg)     | 87 ± 2      | 80 ± 3*       | 73 ± 1      | 71 ± 3      | 79 ± 2      | 74 ± 5      | 73 ± 2      | 73 ± 3      | 86 ± 2      | 74 ± 3*     | 71 ± 1      | 72 ± 4      |
| -dP/dt (mmHg/s) | -9950 ± 240 | -11030 ± 550* | -8620 ± 360 | -8560 ± 590 | -9560 ± 280 | -9950 ± 390 | -9000 ± 430 | -9540 ± 510 | -9820 ± 160 | -9880 ± 310 | -9050 ± 410 | -9320 ± 330 |

LVP, left ventricular pressure; EDP, end-diastolic pressure; SysP, systolic pressure; DiaP, diastolic pressure. All measurements are means ± S.E.M. \*  $P < 0.05$  vs. respective controls; two-tailed Student's  $t$  test.

**Supplementary Table 3. Primers for qRT-PCR**

| Gene          | Primer sequences                        |
|---------------|-----------------------------------------|
| <i>Tnf</i>    | Forward- 5' CAGTTCTATGGCCCAGACC 3'      |
|               | Reverse- 5' CTTGGTGGTTTGCTACGAC 3'      |
| <i>Il6</i>    | Forward- 5' TCTATACCACTTCACAAGTCGGA 3'  |
|               | Reverse- 5' GAATTGCCATTGCACAACCTCTTT 3' |
| <i>Atp2a2</i> | Forward- 5' ATTACAGCCTTTGTAGAGCC 3'     |
|               | Reverse- 5' CATTCTTTCTGCCACAC 3'        |
| <i>Gapdh</i>  | Forward- 5' TCCTTTAGGATTTGGCCGT 3'      |
|               | Reverse- 5' TTGATGGCAACAATCTCCAC 3'     |

## Supplementary Figure 1

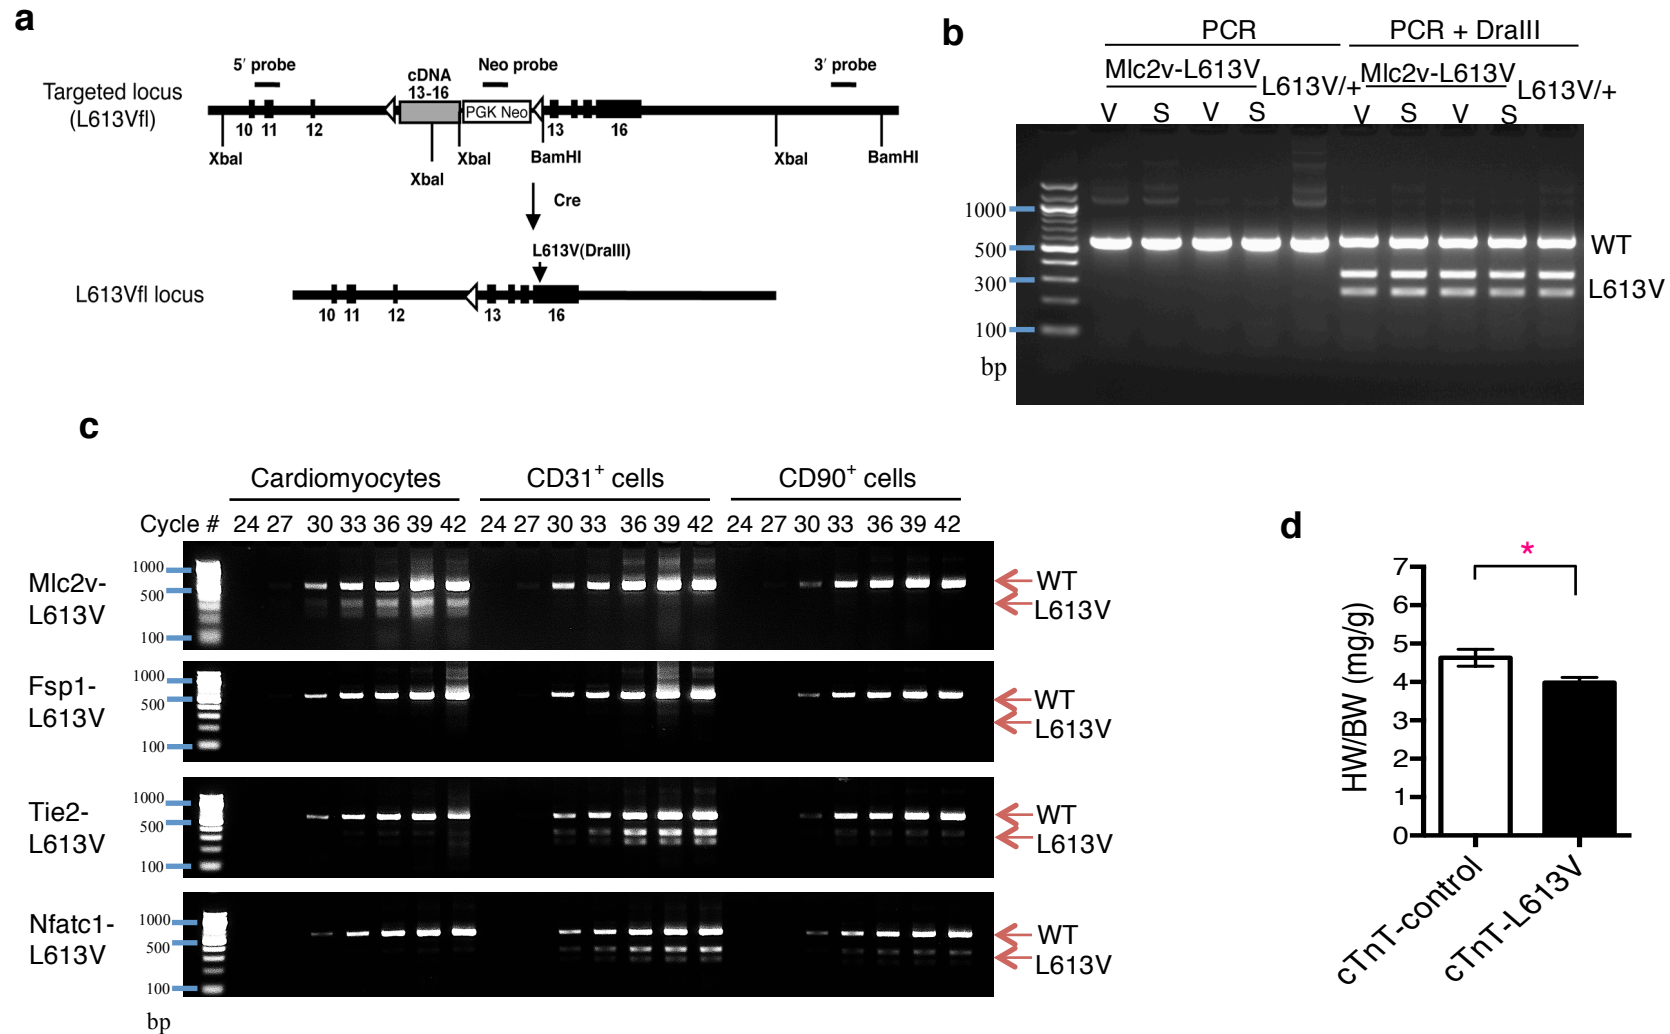

**Supplementary Figure 1.** Assessment of lineage-specific expression of *Raf1* mutant. **a**, Targeting strategy for inducible *Raf1*<sup>L613V</sup> knock-in mice. Figure adapted from Wu *et al.*<sup>1</sup>. **b**, *Raf1*<sup>L613V</sup> is expressed at similar levels in hearts of Mlc2v-L613V and global knock-in mice. RNA was isolated from the left ventricle (V) or septum (S) of two Mlc2v-L613V hearts or the total heart of a global knock-in (L613V<sup>+/+</sup>) mouse, and reverse transcribed into cDNA. The PCR product of the resulting cDNA was digested with DraIII, indicating *Raf1*<sup>L613V</sup> expression. **c**, Similar to **b**. RNA was extracted from isolated CMs, CD31<sup>+</sup>, CD90<sup>+</sup> cells to assess specificity of Cre lines. **d**, No increase in HW/BW ratio in *cTnT*Cre: *Raf1*<sup>L613Vfl/+</sup> mice (mean ± S.E.M.; *n* = 7 (cTnT-control); 5 (cTnT-L613V); \* *P* < 0.05, two-tailed Student's *t* test).

## Supplementary Figure 2.

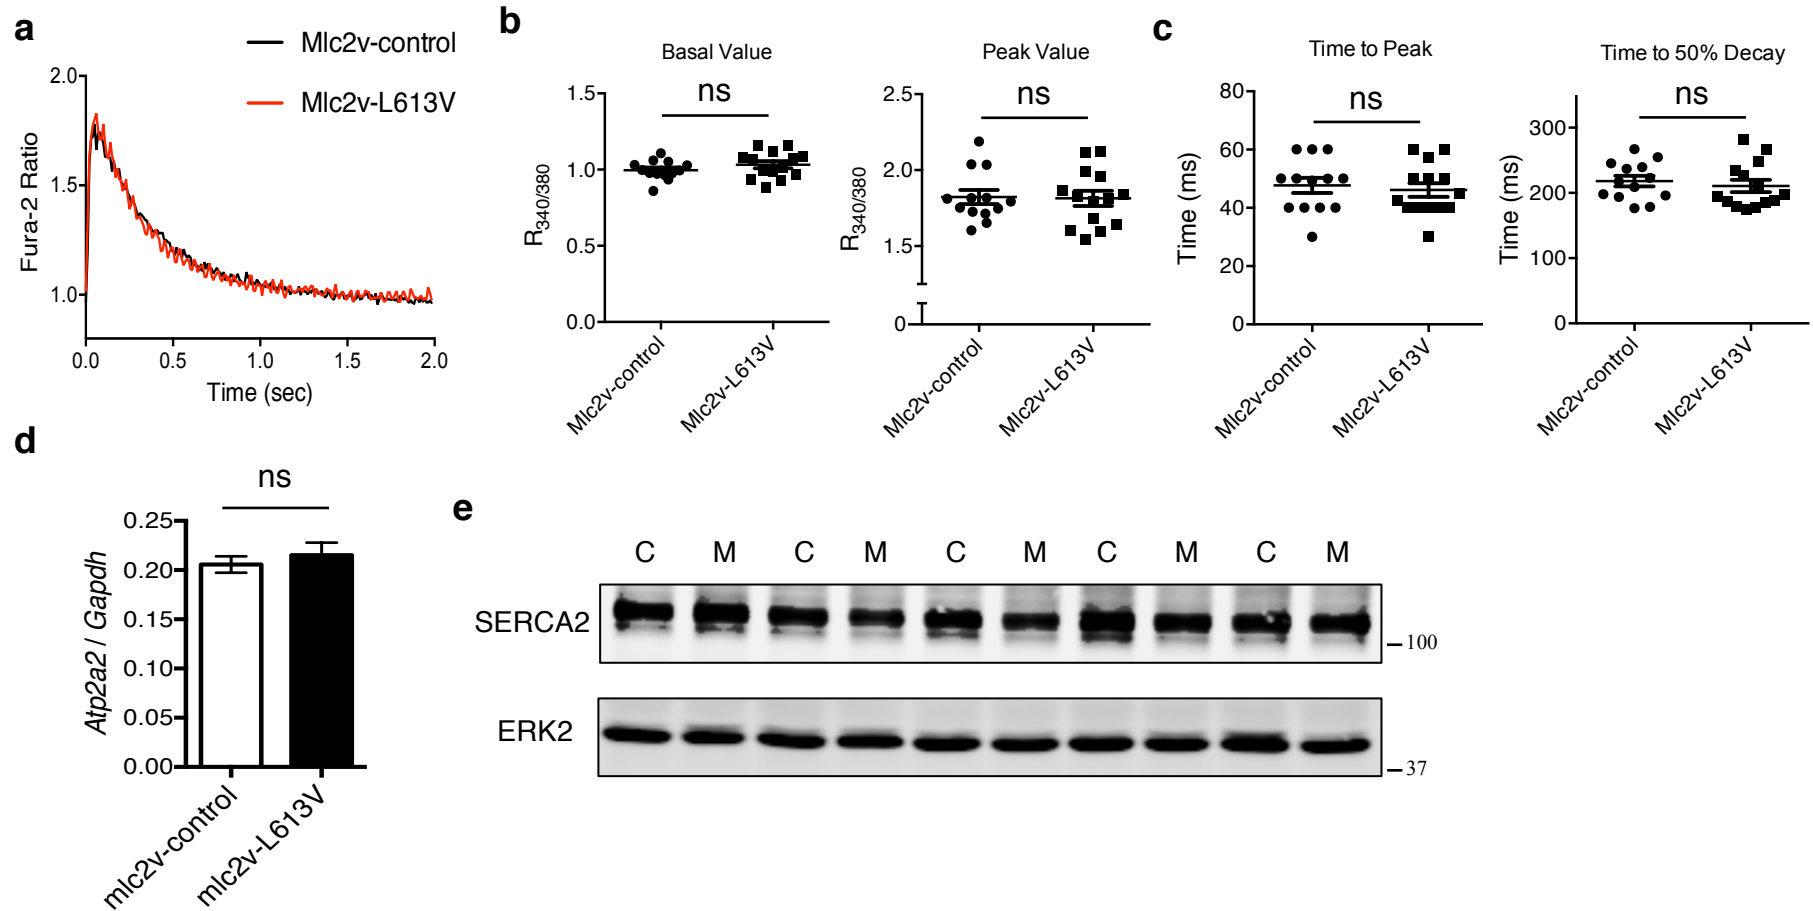

**Supplementary Figure 2.** No difference in calcium transient in CM-restricted RAF1 mutants. **a-c**,  $\text{Ca}^{2+}$  transients in freshly isolated single adult ventricular CMs. Fura-2 fluorescence was measured in freshly isolated, single ventricular CMs superfused with Krebs's Henseleit solution containing 1.2 mM free  $\text{Ca}^{2+}$ . CMs were field-stimulated at 0.5 Hz, and  $\text{Ca}^{2+}$  transients were recorded using single cell imaging. **a**, Representative traces of superimposed  $\text{Ca}^{2+}$  transients in control and Mlc2v-L613V CMs. **b**, Basal and peak values of  $\text{Ca}^{2+}$  transients, **c**, Time required for peak of  $\text{Ca}^{2+}$  transient to occur after field stimulation and time to 50% decay of  $\text{Ca}^{2+}$  transients are shown for the two groups of mice (mean  $\pm$  S.E.M;  $n=17$  cells in each group from 7 mice in each group; statistical significance was assessed using two-tailed Student's  $t$  test). **e** and **f**, no difference in *Atp2a2* (encoding SERCA) mRNA, assessed by qRT-PCR (mean  $\pm$  S.E.M,  $n=6$  (Mlc2v-control) and 7 (Mlc2v-L613V); statistical significance was assessed using two-tailed Student's  $t$  test). (**e**), or SERCA protein levels, assessed by immunoblotting (**f**), between Mlc2v-control (C) and -L613V mutants (M).



### Supplementary Figure 3.

#### Sarcomere Length

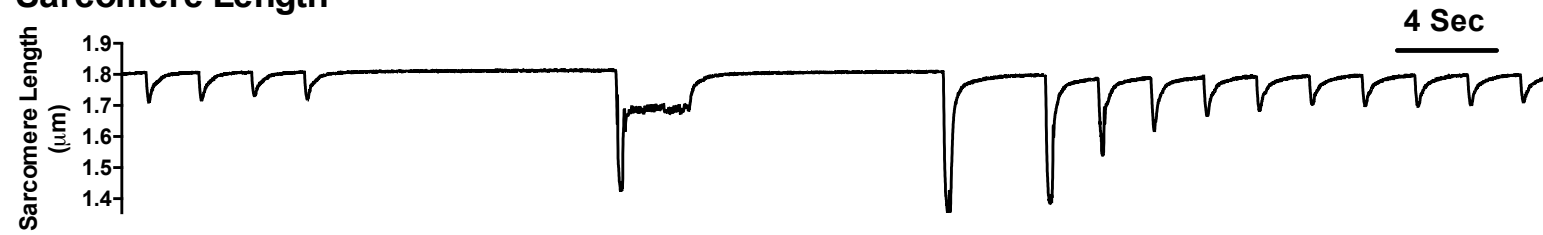

#### Force

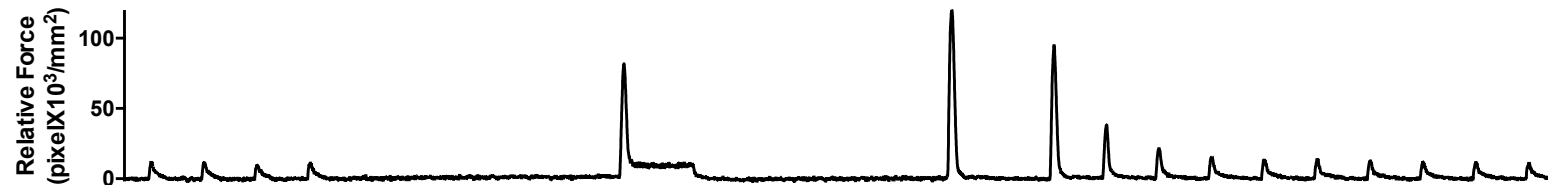

#### Calcium

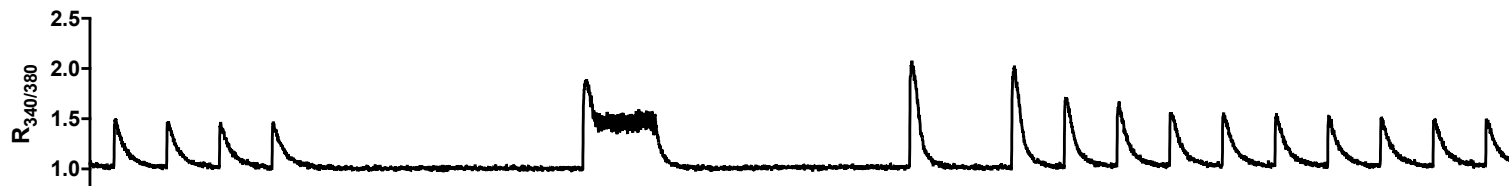

#### Stimulus

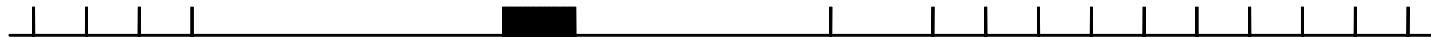

**Supplementary Figure 3.** Simultaneous force,  $\text{Ca}^{2+}$  and sarcomere length measurements in single isolated CMs during twitches following field stimulation. Values were recorded as a function of time in isolated CMs attached to glass rods (see Methods). Force levels were varied by rapidly stimulating CMs at 10 Hz for  $\sim 2$  seconds, followed by a pause for 5 seconds, followed by resumption of field stimulation. Note that the first contraction (corresponding to trace 1 of Supplementary Fig. 4) after the rest period yielded a much larger peak force than that generated before the rapid stimulation (“rest potentiation”). This increase in peak force is associated with a much larger peak  $\text{Ca}^{2+}$  transient and a much large amount of peak internal sarcomere length shortening. With further repeated stimulation, the peak force (as well as peak  $\text{Ca}^{2+}$  and peak sarcomere length shortening) decays back to the baseline levels (traces 2-5 of Supplementary Fig. 4), a phenomenon called post-rest potentiation decay. This maneuver allows assessment of the force- $\text{Ca}^{2+}$  relationship for twitches under a large range of peak force and peak  $\text{Ca}^{2+}$  levels.

## Supplementary Figure 4.

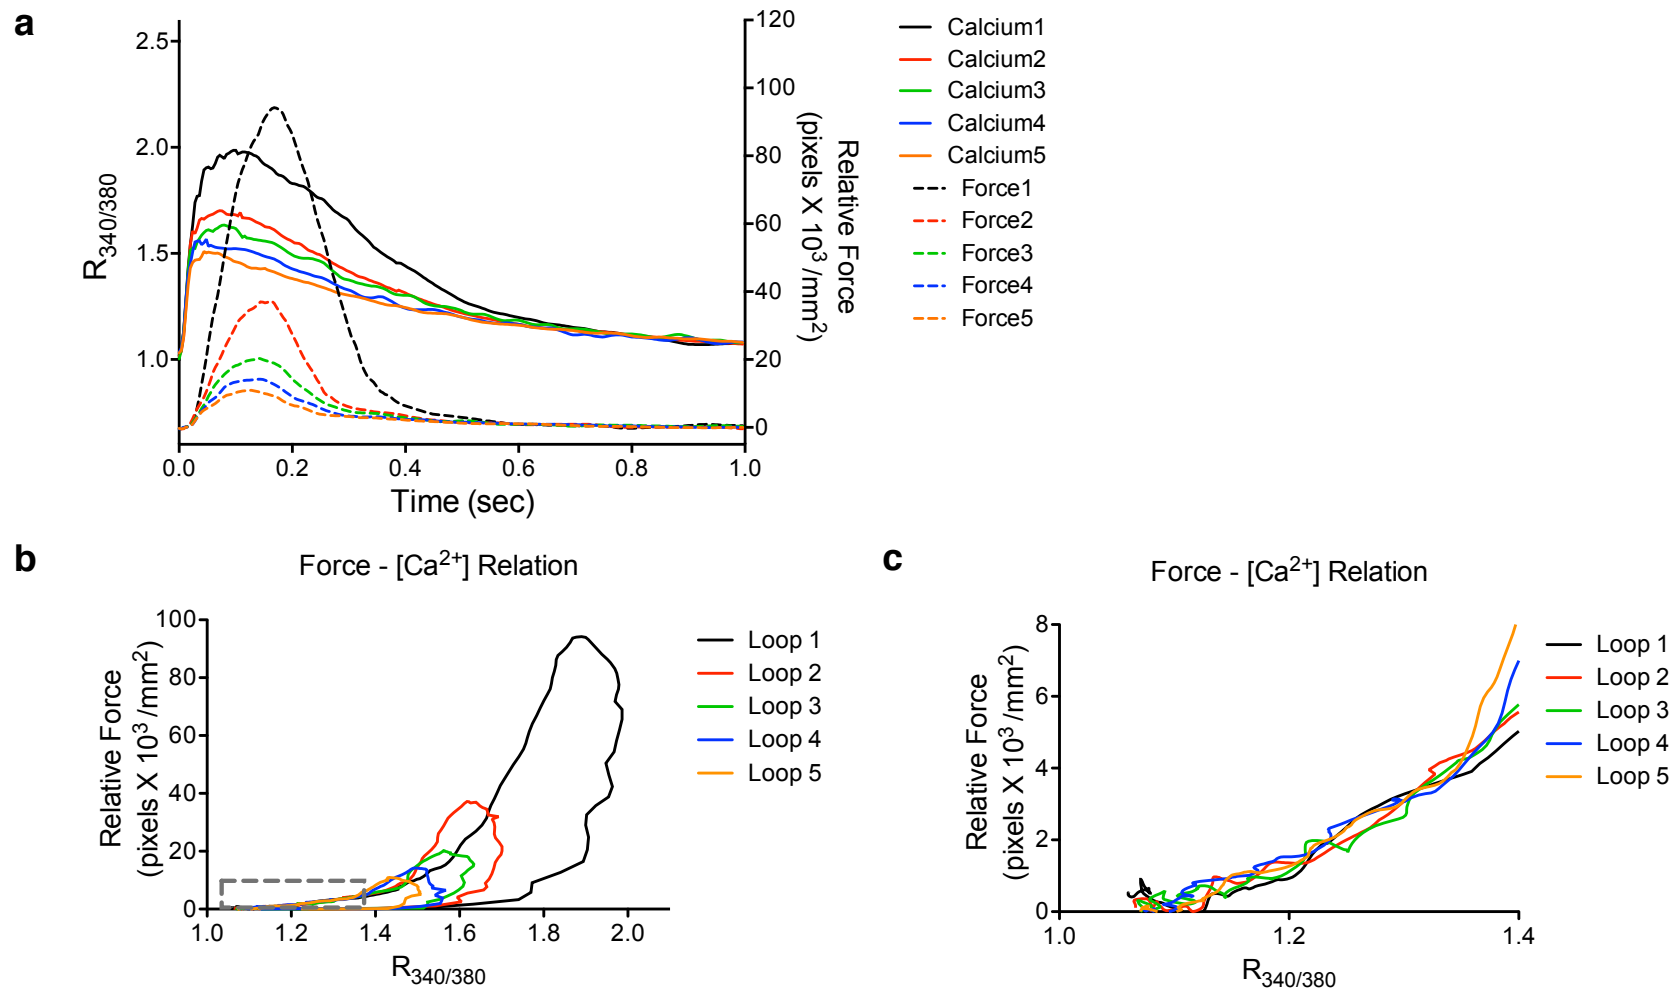

**Supplementary Figure 4.** Relationship between force and  $\text{Ca}^{2+}$  during field stimulation. **a**, Superimposed force and  $\text{Ca}^{2+}$  traces. Peak force and  $\text{Ca}^{2+}$  levels were generated as described in Supplementary Fig. 3. Traces are color-coded and represent measurements of different twitches generated during post-rest potentiation and decay. **b**, Superimposed force- $\text{Ca}^{2+}$  relationships (phase plots) for the traces (1-5) shown in **a**. Note that in the late phase of relaxation, when the sarcomere length has nearly returned to its diastolic resting length of 1.8  $\mu\text{m}$ , phase plots of the force- $\text{Ca}^{2+}$  relationship converge onto a single relationship (i.e., the phase plots superimpose exactly, suggesting a steady state is reached independent of the peak force level generated during the twitch). **c**, magnification of the force- $\text{Ca}^{2+}$  traces during the late phase of relaxation, illustrating more clearly the converging nature of the force- $\text{Ca}^{2+}$  relationship.

**Supplementary Figure 5.**

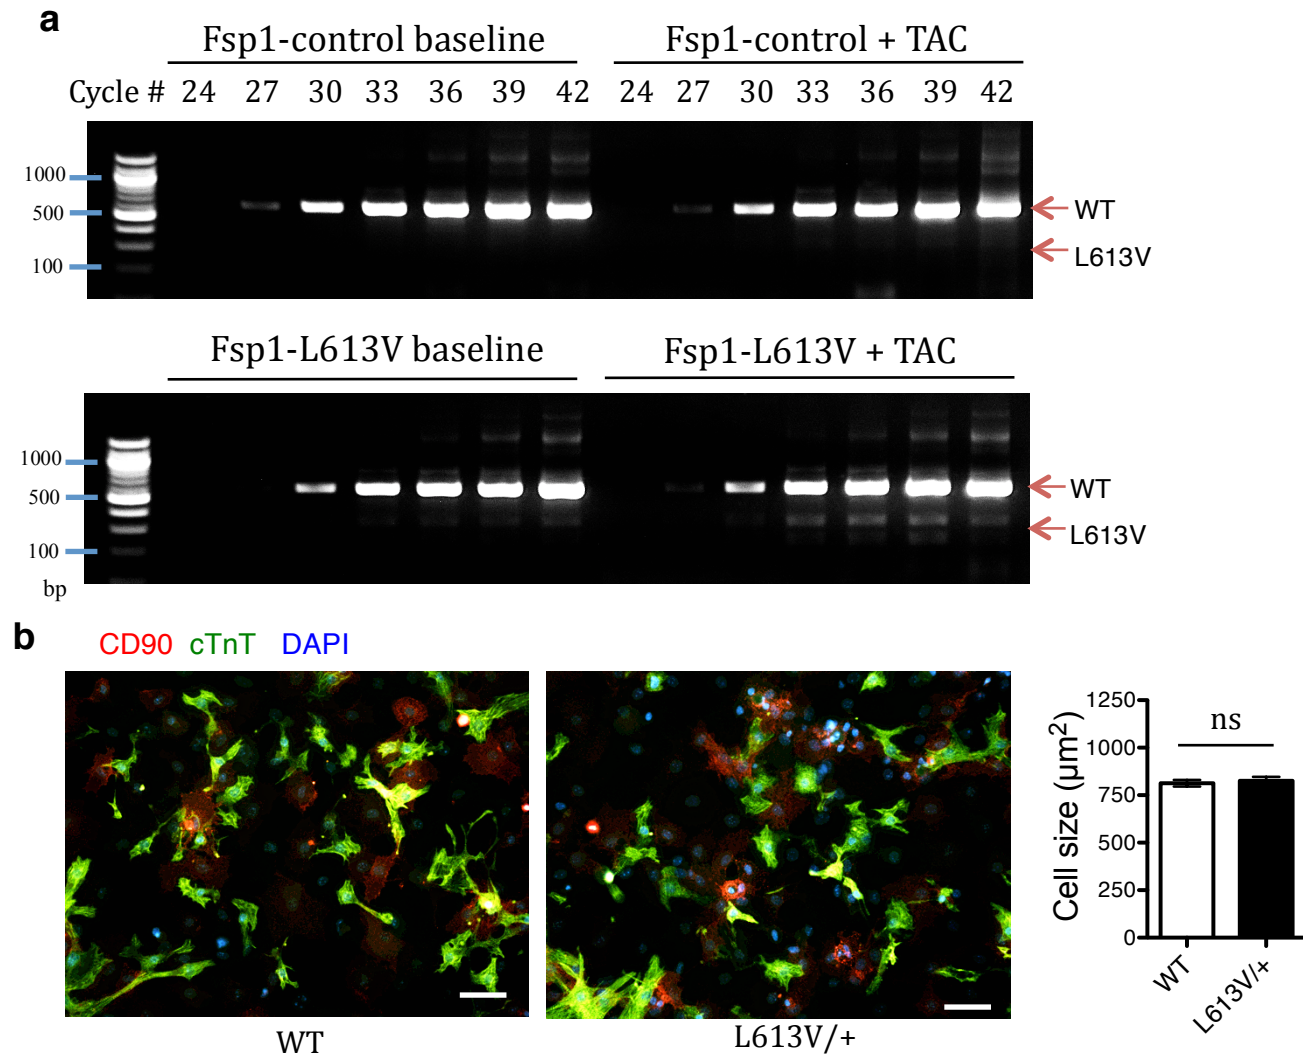

**Supplementary Figure 5.** Raf1 mutant expression in fibroblasts does not promote CM hypertrophy *in vitro*. **a**, *Raf1*<sup>L613V</sup> expression is induced in hearts of Fsp1-L613V mice following TAC. RNA was isolated from total heart of Fsp1-control or -L613V mice with or without TAC, and reverse transcribed into cDNA. The PCR product of the resulting cDNA was digested with DraIII, indicating *Raf1*<sup>L613V</sup> expression. **b**, CD90<sup>+</sup> cells were isolated from *Raf1*<sup>L613V</sup> knock-in mice. Left: Representative immunofluorescence staining showing comparable myocyte size following co-culturing with RAF1 control vs. mutant CD90<sup>+</sup> cells (original magnification, ×200, scale bar: 50 µm). Right: Quantification of one of three independent experiments with similar results.

## Supplementary Figure 6.

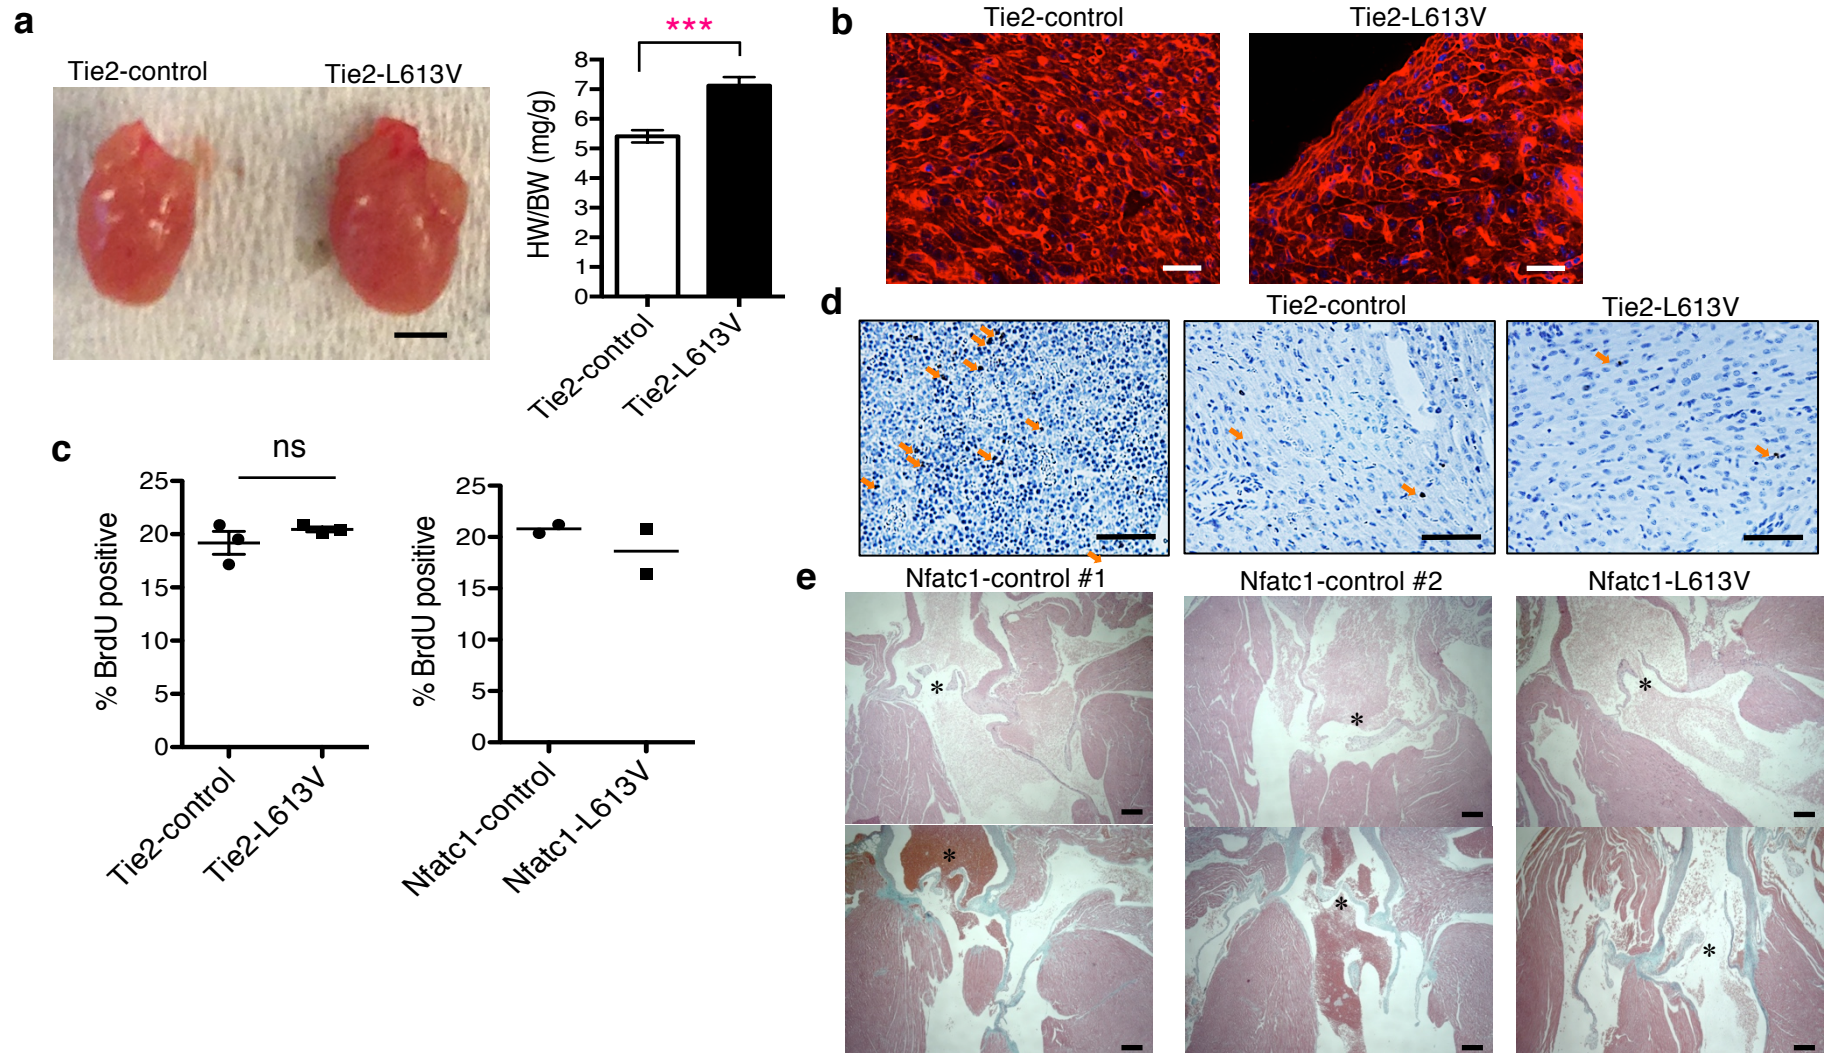

**Supplementary Figure 6.** **a**, Representative gross morphology (scale bar: 1 mm) and HW/BW of Tie2-L613V and control hearts at postnatal day 4 (mean  $\pm$  S.E.M.;  $n = 16$  (Tie2-control) or 7 (Tie2-L613V); \*\*\* $P < 0.0001$ , two-tailed Student's  $t$  test). **b**, Representative WGA-stained cross-sections of hearts at postnatal day 4 from Tie2-L613V and control mice (original magnification,  $\times 400$ , scale bars: 25  $\mu\text{m}$ ). **c**, Tie2- and Nfatc1-L613V hearts show similar levels of BrdU incorporation compared to littermate controls at E16.5 (Left: mean  $\pm$  S.E.M.;  $n = 3$  (Tie2-control) or 3 (Tie2-L613V); two-tailed Student's  $t$  test; Right: mean;  $n = 2$  (Nfatc1-control), or 2 (Nfatc1-L613V)). **d**, Tie2-L613V and control hearts show comparable TUNEL staining (original magnification,  $\times 400$ , scale bars: 50  $\mu\text{m}$ ). Liver staining is shown as positive control. Arrows indicate TUNEL<sup>+</sup> cells. **e**, H&E and Masson's Trichrome staining of serial heart sections, showing normal aortic valves (asterisks) in Nfatc1-L613V mice at week 10 (original magnification,  $\times 50$ , scale bars: 200  $\mu\text{m}$ ).



## Supplementary Figure 7.

**a** CD31 cTnT DAPI

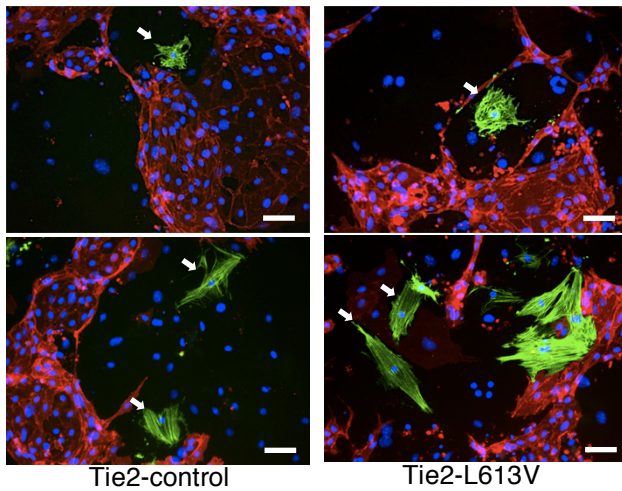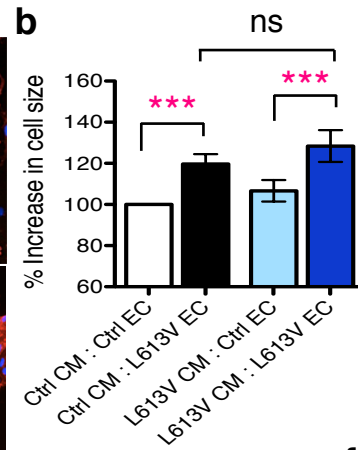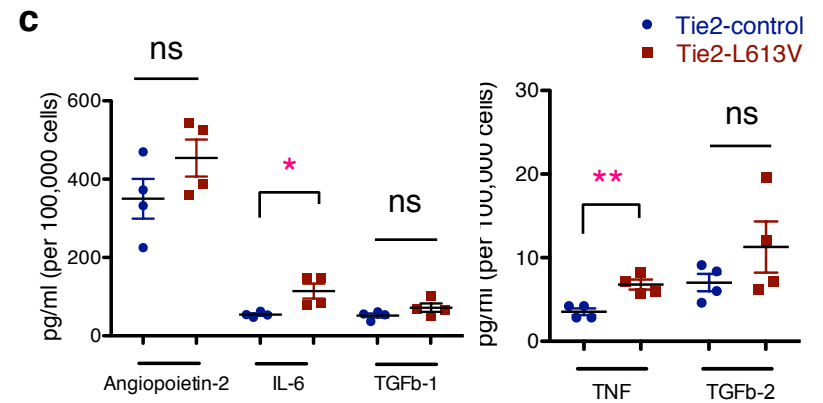

**d**

|          | Tie2-control | Tie2-L613V | log2 (L613V/control) |
|----------|--------------|------------|----------------------|
| Ahsg     | 62.3         | 26.4       | -1.2                 |
| Sfrp2    | 11           | 4.7        | -1.2                 |
| Ace2     | 0.7          | 0.3        | -1.2                 |
| Eln      | 431.7        | 225.6      | -0.9                 |
| Npr3     | 18.8         | 10         | -0.9                 |
| Adamtsl2 | 42           | 24.3       | -0.8                 |
| Angpt1   | 3.8          | 2.3        | -0.7                 |
| Nppa     | 88.4         | 149        | 0.8                  |
| Timp1    | 72.7         | 134.2      | 0.8                  |
| Cd163    | 1.4          | 3.2        | 1.2                  |
| Il18     | 3            | 7.6        | 1.3                  |
| S100a8   | 29           | 74.2       | 1.4                  |
| Spp1     | 25.8         | 69.3       | 1.4                  |
| Mmp27    | 2            | 5.5        | 1.5                  |
| Mmp12    | 6.5          | 18.4       | 1.5                  |
| Osm      | 0.3          | 0.9        | 1.5                  |
| S100a9   | 15.3         | 46         | 1.6                  |
| Mmp13    | 0.4          | 1.3        | 1.6                  |
| Tnf      | 1.4          | 4.3        | 1.6                  |
| Fcgr2b   | 3            | 9.5        | 1.7                  |
| Mmp8     | 3.6          | 12.8       | 1.8                  |

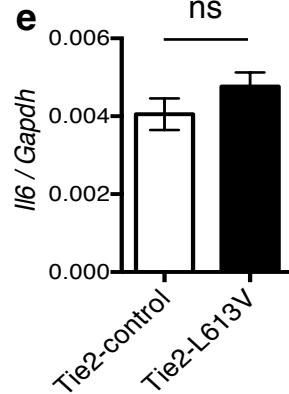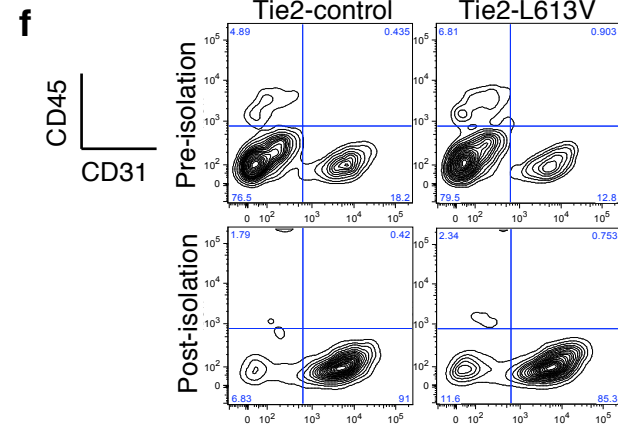

**g**

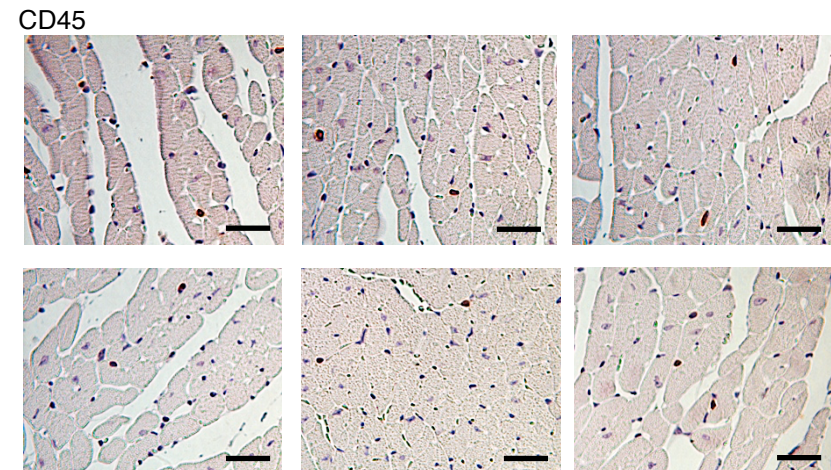

**Supplementary Figure 7.** **a**, Additional images showing immunofluorescence staining for CD31 (magenta), cardiac troponin T (green) and DAPI (blue) in co-cultures (original magnification,  $\times 200$ , scale bars: 50  $\mu\text{m}$ ). Arrows indicate individual CMs that were among those assessed for cell size by ImageJ. **b**, RAF1 mutant CMs co-cultured with mutant ECs display no additional hypertrophy. Quantification of one of three independent experiments with similar results (mean  $\pm$  S.E.M.; 300 CMs counted per group; \*\*\*  $P < 0.001$ , two-tailed Mann-Whitney test). **c**, Cytokine levels in EC-conditioned media, measured by Luminex assays (mean  $\pm$  S.E.M.;  $n = 4$  per group; \*  $P < 0.05$ , \*\*  $P < 0.001$ , two-tailed Student's  $t$  test). **d**, RNAseq data indicating differentially expressed genes for secreted proteins in ECs ( $n = 4$  per group). **e**, No difference in *Il6* transcript levels in mutant and control ECs, assessed by qRT-PCR (mean  $\pm$  S.E.M.;  $n = 7$  per group; statistical significance was assessed using two-tailed Student's  $t$  test). **f**, Flow cytometric analysis of primary ECs, showing staining for CD31 and CD45 before and after isolation. Similar results were obtained in an additional experiment. **g**, Tie2-L613V show comparable CD45 staining as their littermate controls (original magnification,  $\times 400$ , scale bars: 25  $\mu\text{m}$ ).

## Supplementary Figure 8.

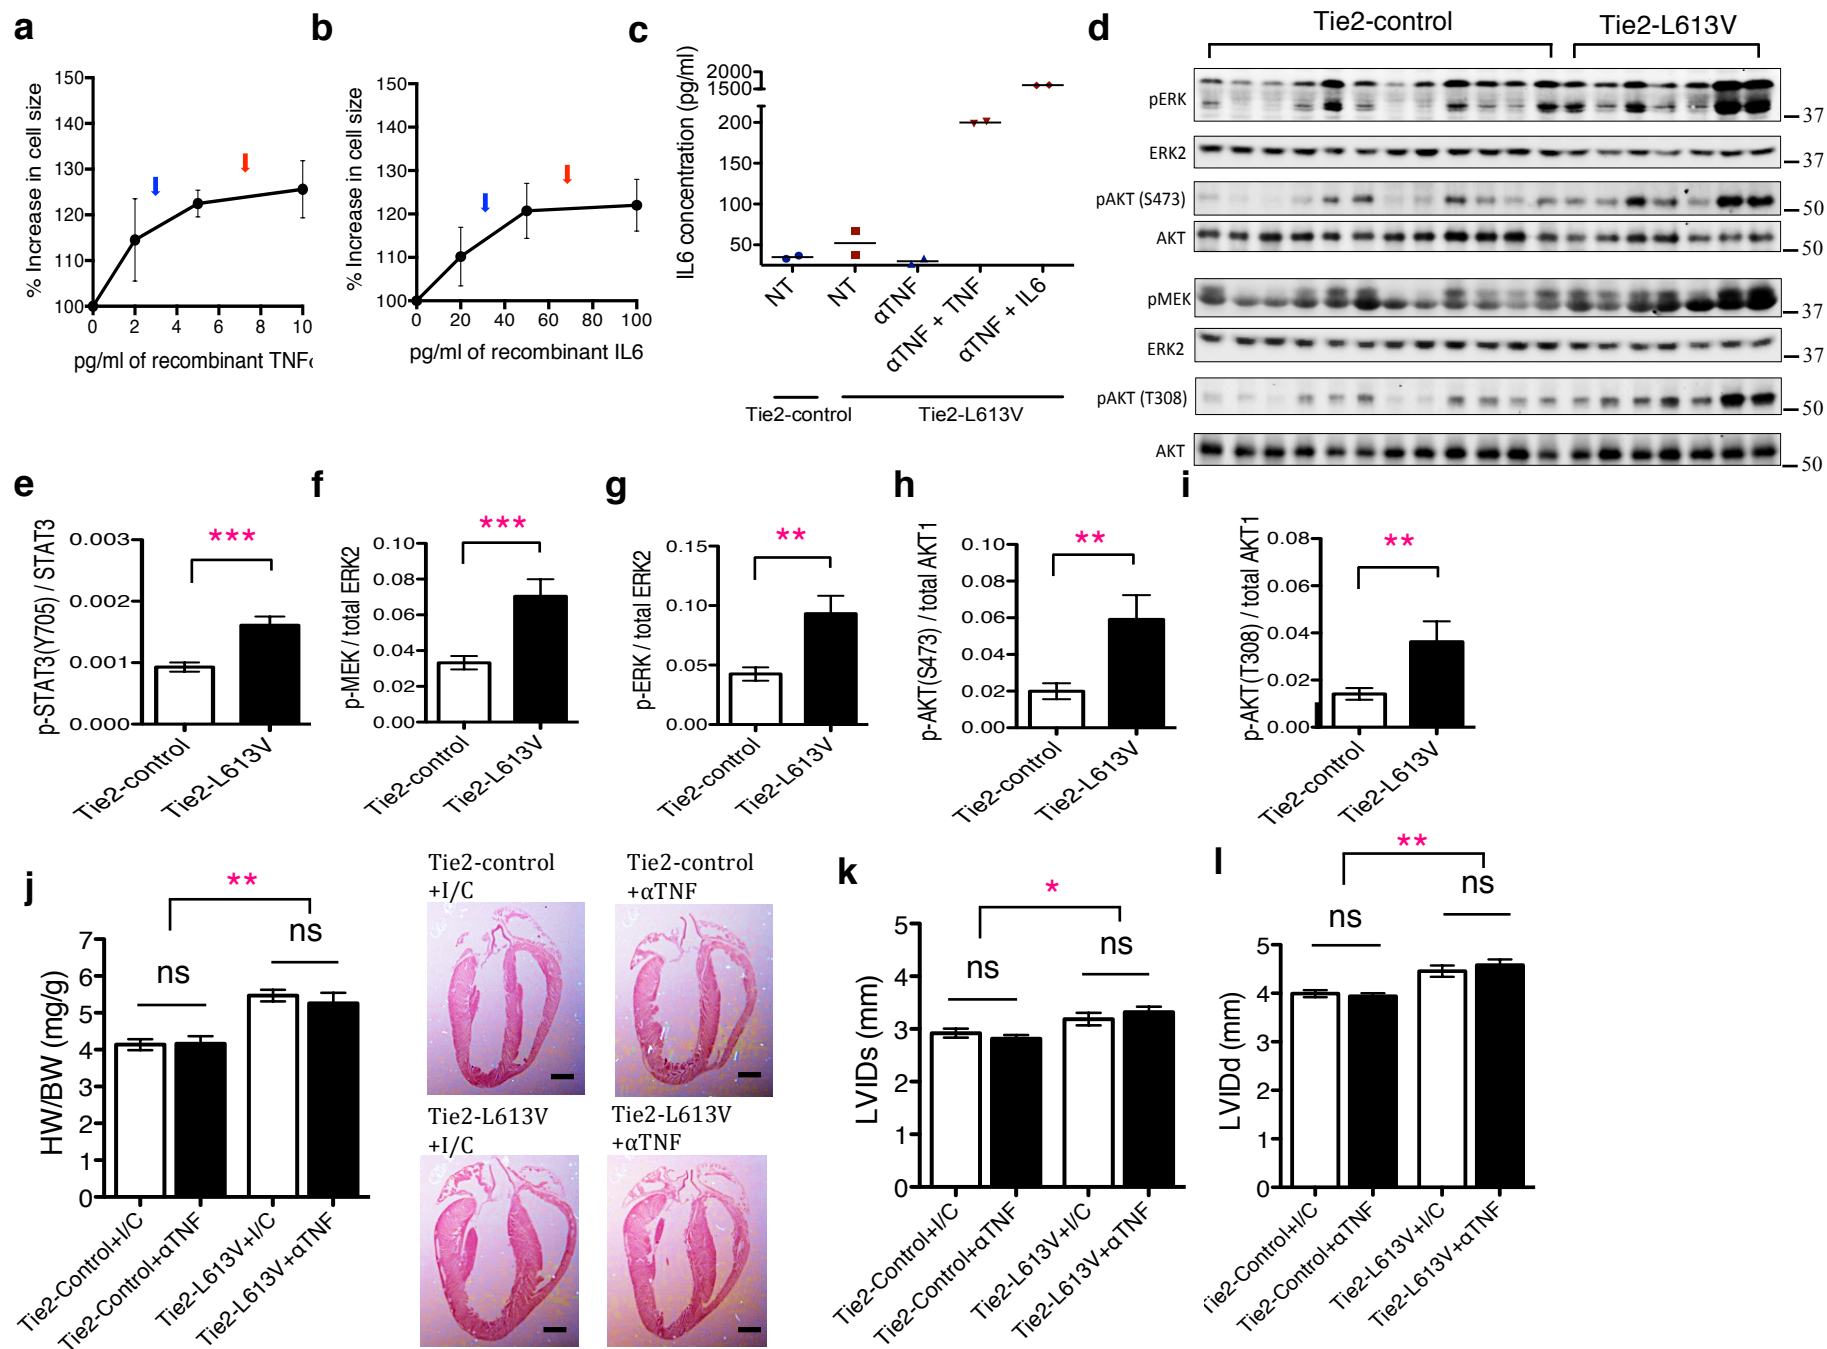

**Supplementary Figure 8. a and b**, WT CMs, treated for three days with recombinant TNF (**a**) or IL6 (**b**) at the indicated doses. Data were pooled from two independent experiments, with 200 CMs for each condition quantified using ImageJ. Arrows indicate concentrations detected in control (blue) and mutant (red) EC-conditioned media. **c**, IL6 levels (measured by ELISA) in anti-TNF antibody-treated co-culture media. Note that anti-TNF antibody treatment reduces IL6 production, which increases upon addition of excess TNF. Anti-TNF antibody treatment plus 25 ng/ml IL6 (Ab + IL6) serves as a positive control (mean;  $n = 2$ ; assays performed in duplicate). **d**, Additional immunoblots from the same experiment as in Fig. 5h. **e**, Quantification of immunoblots shown in Fig. 5h ( $***P < 0.001$ , two-tailed Student's  $t$  test). **f-i**, Quantification of immunoblots in **d** ( $**P < 0.005$ ;  $***P < 0.001$ , two-tailed Student's  $t$  test). **j**, Left: HW/BW after 6 weeks of anti-TNF Ab treatment (mean  $\pm$  S.E.M.;  $n = 6$  (Tie2-control + isotype control), 5 (Tie2-control + anti-TNF Ab), 4 (Tie2-L613V + isotype control) or 6 (Tie2-L613V + anti-TNF Ab)). Right: Representative H&E staining (scale bar: 1 mm). **k and l**, LVIDs and LVIDd, measured by echocardiography at the end of anti-TNF Ab treatment (mean  $\pm$  S.E.M.;  $n = 13$  (Tie2-control + isotype control), 15 (Tie2-control + anti-TNF Ab), 9 (Tie2-L613V + isotype control) or 12 (Tie2-L613V + anti-TNF Ab);  $* P < 0.05$ ,  $**P < 0.005$ , Bonferroni's post-test when ANOVA was significant).



**Supplementary Figure 9.**

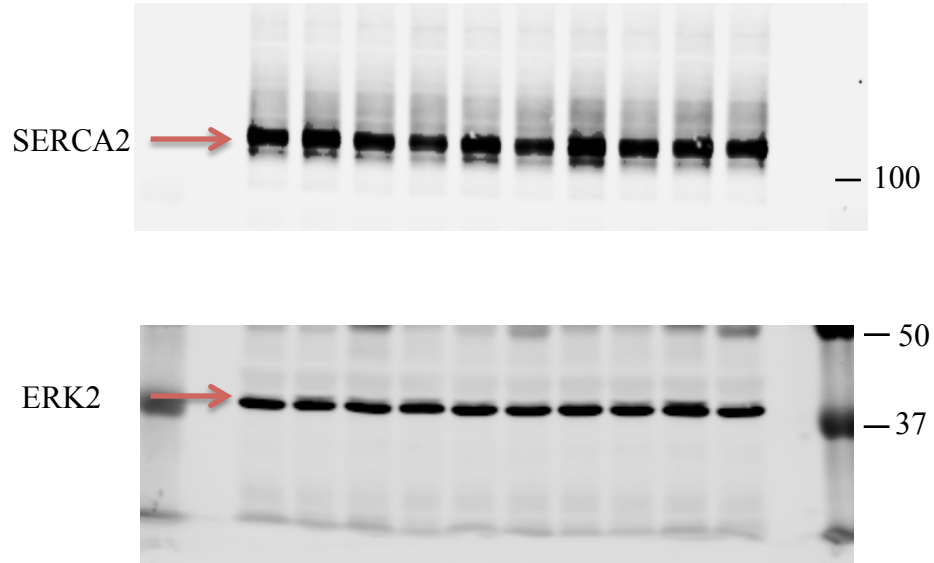

**Supplementary Figure 9.** Uncropped immunoblots for Supplementary Fig. 2e.

**Supplementary Figure 10.**

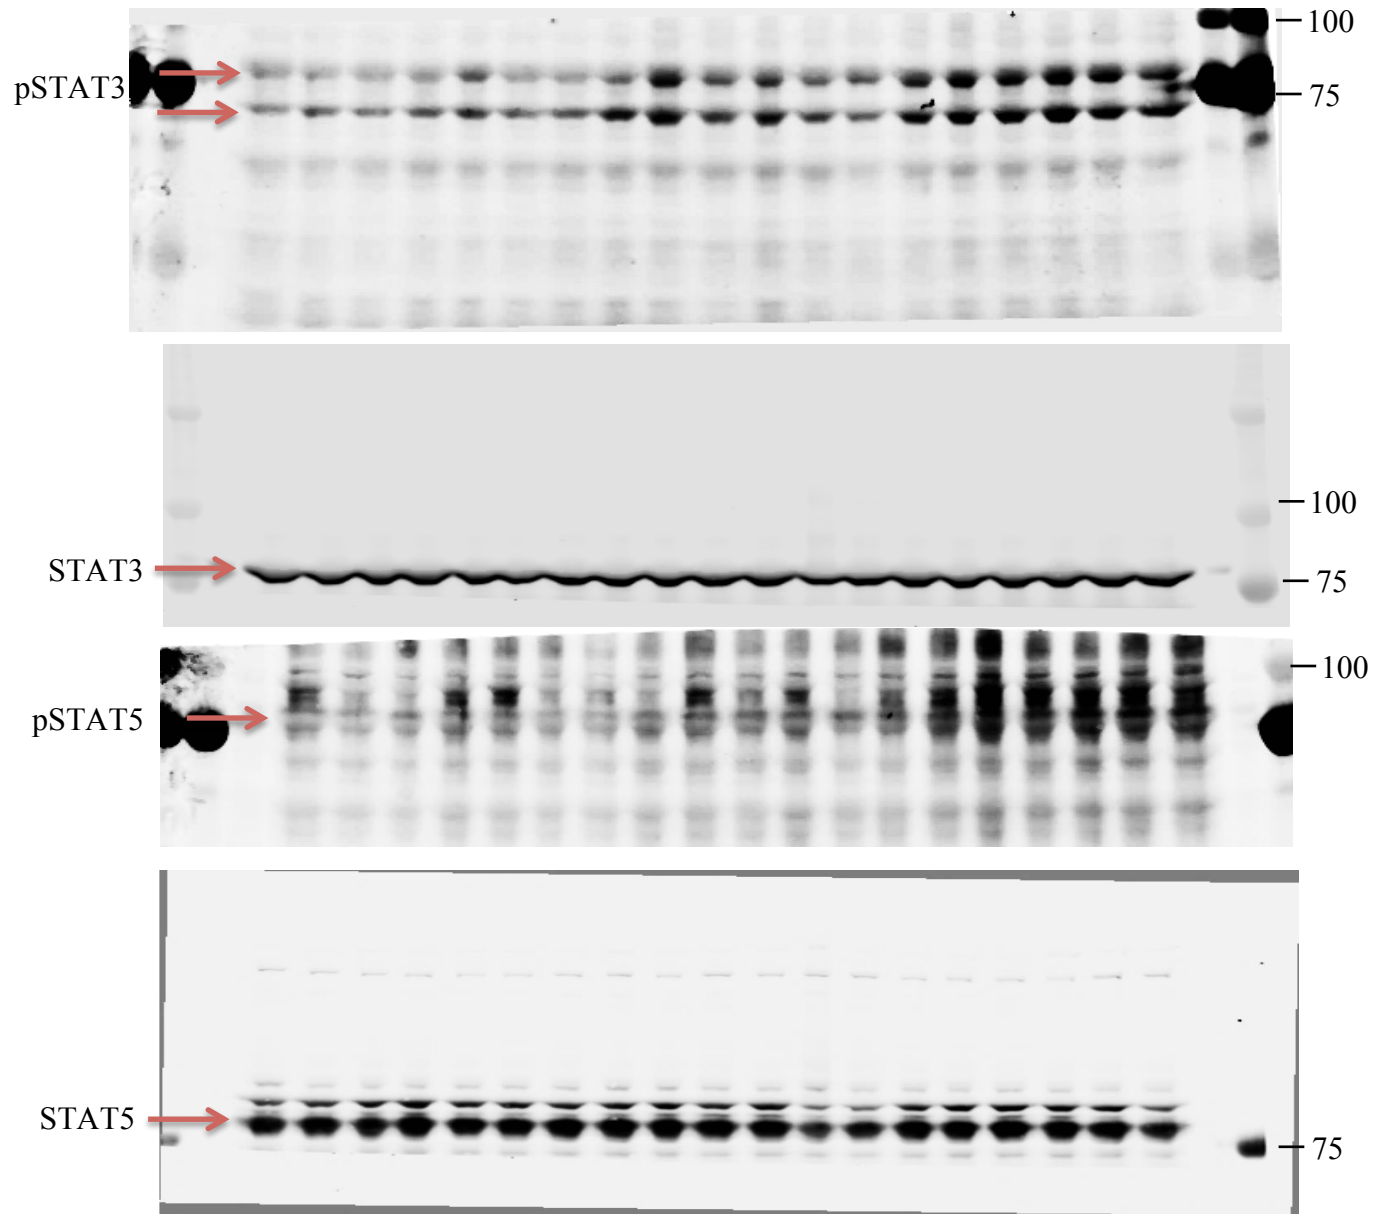

**Supplementary Figure 10.** Uncropped immunoblots for Fig. 5h.

**Supplementary Figure 11.**

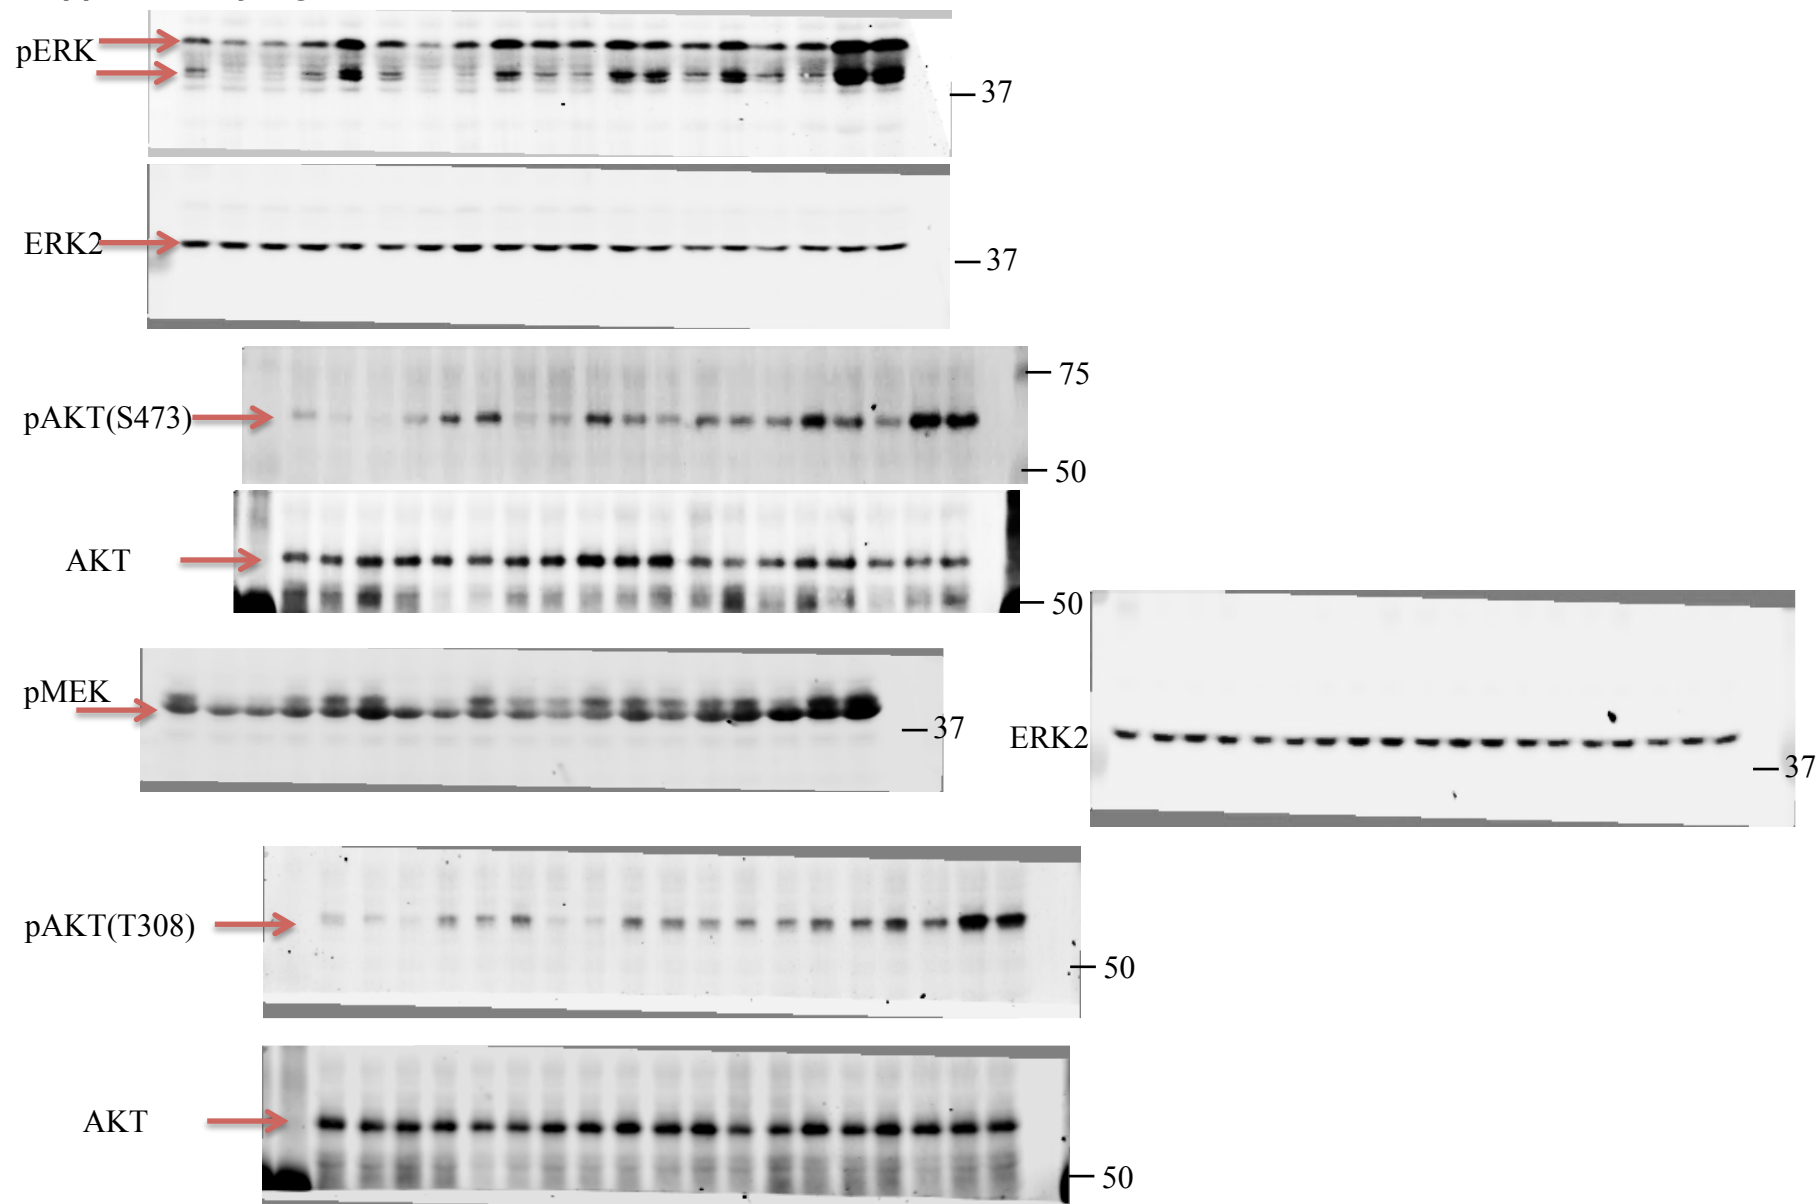

**Supplementary Figure 11.** Uncropped scans of immunoblots in Supplementary Fig. 8d.
